# Supplementary material for: A convenient diagnostic tool for discriminating adult-onset glutamic acid decarboxylase antibody-positive autoimmune diabetes from type 2 diabetes: a retrospective study
Source: PeerJ. 2020 Feb 14;8:e8610. doi: 10.7717/peerj.8610 (PMC7025710; doi:10.7717/peerj.8610)
Supplement: Data S1 [file peerj-08-8610-s002.xls]

## Sheet: Sheet1
Patient ID	Group(1,GADA+;2,T2DM)	BMI	Age at onset (years)	Gender(Men, 1;Women, 2)	HbA1C (%)	Total cholesterol (mg/dL)	Triglyceride (mg/dL)	High density lipoprotein cholesterol (mg/dL)	glutamic pyruvic transaminase (U/L)	Creatinine (mg/dL)	smoking (yes,1;No,0)	Use of statin(yes,1;No,0)	Use of Fibrate(yes,1;No,0)	GAD titer(NA, no data)
2	1	20.1723	53	2	11.6	178	55	58	9	0.7	0	0	0	295.66
3	1	22.232	54	2	8.4	151	54	61	14	0.515	0	0	0	201
4	1	24.8057	56	2	11.6	177	55	66	38	0.58	0	0	0	2000
5	1	22.6409	51	2	6.2	270	60	71	13	0.29	0	0	0	176.54
6	1	22.8312	41	1	6.9	228	51	76	14	0.7	0	0	0	326
7	1	18.6966	45	2	13.6	149	39	55	33	0.58	0	0	0	2000
8	1	20.7157	42	1	14.1	146	116	26	30	1	0	0	0	2000
9	1	17.4261	41	2	12	138	32	54	11	0.515	0	0	0	154.31
10	1	16.0231	41	2	14.4	130	95	65	52	0.8	0	0	0	2000
11	1	24.3364	38	1	11.4	95	71	27	30	0.68	0	0	0	164
12	1	26.0863	33	2	9.3	201	65	97	14	0.64	0	0	0	2000
13	1	26.2246	33	1	6.7	126	52	46	16	0.84	1	0	0	2000
14	1	20.9572	32	2	14.8	180	89	57	12	0.63	0	0	0	2000
15	1	19.8853	32	1	14.4	194	26	77	21	0.88	0	0	0	574
16	1	21.9038	25	1	14.2	171	97	28	16	0.86	0	0	0	181.31
17	1	19.8584	27	2	9.3	179	32	57	15	0.53	0	0	0	252
18	1	22.5341	69	2	10.1	204	59	58	12	0.755	0	0	0	95.71
19	1	20.7232	72	1	11.6	176	50	64	34	0.775	1	0	0	99.72
20	1	22.9591	41	1	7.5	117	97	58	30	1.05	1	0	0	112.36
21	1	25.6369	41	2	10.1	168	51	58	18	0.6	0	0	0	49.86
22	1	23.9448	42	1	18.9	103	80	58	70	1	1	0	0	69.3
23	1	18.6983	51	2	15	176	51	52	19	0.57	0	0	0	92.29
24	1	22.316	43	2	11.3	142	27	70	18	0.675	0	0	0	55.4
25	1	19.1001	39	1	7.8	182	120	40	20	1	0	0	0	106.66
26	1	25.9698	53	2	13.4	256	97	74	21	0.535	0	0	0	91.8
27	1	21.8541	46	2	13.1	151	65	46	78	0.495	0	0	0	56.39
28	1	22.5895	50	2	8.7	253	69	46	12	0.5	0	0	0	11.34
29	1	20.722	50	2	11.9	180	65	43	9	0.455	0	0	0	57.69
30	1	18.4725	42	1	12.6	185	36	59	165	0.67	1	0	0	69.39
31	1	19.7003	41	2	16.6	214	70	48	27	0.75	0	0	0	21
32	1	23.6755	43	2	16.8	223	40	105	26	2.08	0	0	0	32.8
33	1	17.78	45	1	12.5	137	98	39	21	0.6	1	0	0	63.71
34	1	20.3734	48	1	10.5	249	156	33	22	0.8	0	0	0	25.1
35	1	21.2037	40	2	11.7	138	104	29	19	0.705	0	0	0	92.2
36	1	21.5482	41	1	7.6	187	394	28	12	0.665	1	0	0	63.91
37	1	20.4165	40	1	7	144	29	65	11	0.83	0	0	0	32.2
38	1	25.3365	39	1	8.8	148	119	38	25	0.725	1	0	0	107.9
39	1	25.0821	31	1	6.7	140	43	45	30	1	0	0	0	88.81
40	1	28.4342	34	1	13.8	182	70	46	8	0.65	1	0	0	108.15
41	1	23.0816	35	2	16.3	162	82	56	27	0.8	0	0	0	109.93
42	1	17.5146	36	2	9.9	139	26	72	27	0.41	0	0	0	103.72
43	1	22.6096	39	1	13.1	137	118	33	26	1.065	0	0	0	96.71
44	1	18.8258	36	1	13.6	239	91	51	10	0.82	1	0	0	102.07
45	1	30.3766	37	1	6.9	166	80	37	30	0.965	1	0	0	30.1
46	1	20.4333	37	1	6.6	142	82	32	29	0.94	1	0	0	71.08
47	1	25.6184	32	1	13.2	137	96	41	30	0.81	0	0	0	43.2
48	1	29.9148	20	2	11	183	83	52	11	0.8	0	0	0	19.93
49	1	20.1163	31	1	12.9	138	30	60	17	0.9	1	0	0	22.36
50	1	19.9838	32	2	15.1	270	75	62	15	0.53	0	0	0	17.78
51	1	20.3086	35	1	11.3	168	67	53	17	0.64	0	0	0	12.63
52	1	20.6949	28	1	9.8	298	80	59	21	0.715	0	0	0	41.56
53	1	27.6364	27	1	8.1	170	72	57	21	0.865	1	0	0	21.26
54	1	14.124	28	1	15.4	128	126	51	16	0.48	1	0	0	63.98
55	1	21.0258	31	1	11	132	54	55	21	0.87	0	0	0	42.52
56	1	22.1452	26	1	6.7	239	85	75	44	0.93	0	0	0	88.5
57	1	27.361	27	2	7.1	196	44	65	14	0.64	0	0	0	35.14
58	1	22.2039	30	2	8.2	167	61	79	10	0.26	0	0	0	97.17
59	1	16.0377	27	2	11.8	187	32	71	32	0.51	0	0	0	75.33
60	1	16.1264	27	1	13.2	201	42	73	20	0.765	0	0	0	55.45
61	1	21.6263	26	1	8.3	126	91	44	14	0.78	1	0	0	106.72
62	1	27.143	31	1	9.9	182	65	37	31	0.68	0	0	0	59.57
64	1	20.2251	31	1	16.2	311	46	88	27	0.74	0	0	0	37.63
65	1	19.1151	28	1	13.2	176	49	54	21	0.6	0	1	0	61.06
66	1	21.1637	21	2	14.9	195	43	73	18	0.6	0	0	0	13.6
67	1	22.2153	28	2	14.5	235	79	45	26	0.475	0	0	0	13.04
68	1	18.1792	30	1	15.7	186	66	55	61	0.68	0	0	0	33.67
69	1	16.0297	29	1	10.8	160	156	52	23	0.45	0	0	0	28.4
70	1	19.79	23	1	13.8	204	88	55	29	0.92	0	0	0	70.58
71	1	19.163	25	1	6.8	162	37	42	15	0.8	0	0	0	21.67
72	1	16.9182	26	2	6.5	178	40	81	30	0.76	0	0	0	110.61
73	1	20.4084	24	2	14.1	147	62	55	18	0.39	1	0	0	35.23
78	1	20.0546	23	2	6.3	198	33	85	14	0.64	0	0	0	16.68
93	1	22.2063	61	2	6.9	168	151	58	12	0.85	0	0	0	6.04
94	1	21.58	54	2	7.6	200	130	73	19	1.05	0	0	0	1.3
95	1	25.6694	53	2	8.6	147	41	85	15	0.95	0	0	0	2.46
96	1	21.0727	61	1	9.6	246	133	41	12	1.93	1	0	0	3.26
98	1	21.3507	55	2	15.9	180	64	40	27	0.47	0	0	0	4.05
100	1	22.1199	43	1	9.9	162	51	52	52	1	1	0	0	9.97
101	1	16.911	57	2	7.3	161	67	59	27	0.87	0	0	0	1.74
102	1	21.4949	37	1	7.6	175	52	65	27	1.05	0	0	0	3.99
103	1	16.875	55	2	9.1	344	41	143	23	0.48	0	0	0	9.46
104	1	20.8086	40	1	8.3	177	43	58	9	1.1	0	0	0	1.38
105	1	18.7063	35	2	10.5	157	41	55	12	0.7	0	0	0	1.22
106	1	19.0436	49	2	5.8	213	36	84	12	0.72	0	0	0	1.35
108	1	20.3716	46	2	9	310	89	72	14	0.76	0	0	0	3.29
109	1	22.559	41	1	9.8	208	153	39	17	1.405	0	0	0	1.23
110	1	25.7276	37	1	10.7	282	85	57	27	0.75	1	0	0	1.22
111	1	16.5839	37	2	15.5	236	164	66	20	0.79	0	0	0	7.33
112	1	20.8967	30	1	7	212	90	67	7	0.8	0	0	0	7.37
113	1	21.4844	36	2	7.1	168	51	58	14	0.555	0	0	0	4.47
114	1	21.0256	31	2	6.2	161	38	42	16	0.715	0	0	0	5.6
115	1	23.9338	31	2	7.9	202	25	98	21	0.55	0	0	0	3.96
116	1	20.6223	25	1	13.9	145	22	57	19	0.61	0	0	0	1.36
117	1	18.4234	27	2	6.9	135	56	57	13	0.48	0	0	0	2.74
118	1	22.8099	32	2	5.9	127	65	43	10	0.78	0	0	0	1.22
120	1	19.8748	22	1	7.3	223	126	44	13	0.79	0	0	0	2.89
121	1	29.6188	22	1	10	247	551	50	27	0.68	1	0	0	2.06
122	1	19.1164	21	2	6.6	201	94	116	22	0.6	0	0	0	2.02
123	1	22.9182	24	2	7.1	269	55	77	15	0.65	0	0	0	2.47
124	1	18.6814	20	1	10.7	205	60	84	17	0.92	0	0	0	4.66
126	1	17.9982	21	1	16.6	248	141	32	27	0.51	0	0	0	5.3
128	1	21.8685	20	2	6.9	130	45	56	17	0.495	0	1	0	2.96
501	1	18.9072	64	2	10.5	201	51	58	23	0.75	0	0	0	185.62
502	1	22.9783	62	1	6.5	125	67	46	21	0.75	0	1	0	2000
503	1	17.8035	40	2	10.9	243	43	103	30	0.5	0	0	0	2000
504	1	22.4371	24	1	10.5	158	35	46	11	0.74	0	0	0	251
505	1	21.7079	61	1	9.3	135	109	58	96	0.9	0	0	0	100.42
506	1	30.03	64	1	10.5	202	81	49	32	1.25	0	0	0	14.94
507	1	23.4236	58	2	8.6	188	200	41	27	0.79	0	1	0	117.24
508	1	23.5095	56	1	10.1	228	78	70	27	1.015	0	0	0	39.43
509	1	23.6469	57	1	8.4	156	74	56	30	0.885	1	0	0	120
510	1	22.8906	47	2	7.9	145	46	66	31	0.95	0	1	0	87.91
511	1	22.3925	36	1	7.2	202	77	55	22	1.2	1	0	0	59.54
512	1	16.6661	34	1	17	311	102	70	56	1	1	0	0	58.26
513	1	22.6172	32	1	12.9	233	118	38	10	0.95	1	0	0	86.78
514	1	24.6591	35	2	13.5	199	42	89	34	0.7	0	0	0	58.06
515	1	21.9495	28	2	11.3	179	52	68	19	0.7	0	0	0	94.83
516	1	23.7664	39	2	13.1	262	178	44	15	0.59	0	0	0	14.9
517	1	16.5289	38	2	15.3	274	82	45	44	0.62	0	0	0	106
518	1	22.5525	28	2	12.7	190	83	41	9	0.565	0	0	0	26.69
520	1	19.5717	26	2	8.5	134	40	60	30	0.8	0	0	0	95.22
521	1	19.3426	26	1	8.6	200	122	64	15	0.9	0	0	0	90.25
522	1	21.8994	27	2	10.3	196	188	79	38	0.6	0	0	0	88.01
523	1	18.1191	22	2	15.9	231	128	47	28	0.6	0	0	0	68.14
524	1	17.3935	24	1	9.8	148	58	55	17	0.735	0	0	0	53.66
526	1	30.6108	74	2	9.8	220	105	57	16	0.845	0	0	0	7.65
527	1	18.8132	62	1	6.6	137	65	54	47	0.8	0	0	0	1.18
528	1	22.4775	53	2	10.3	184	113	48	15	0.8	0	0	0	4.04
530	1	22.6326	37	1	8.3	167	115	49	31	0.9	1	0	0	1.17
531	1	19.0193	42	1	12.1	182	52	93	20	0.8	0	0	0	9.33
532	1	22.7021	37	1	13.9	159	87	49	62	1.09	0	0	0	1.28
533	1	23.8166	38	1	6.9	214	398	36	29	0.85	1	0	0	5.01
534	1	24.3068	29	2	7	166	137	40	17	0.7	0	0	1	1.5
535	1	23.9336	40	1	10.1	159	83	38	12	0.93	1	0	0	1.91
537	1	17.9316	36	1	7.3	145	47	44	40	0.885	1	0	0	2.8
538	1	17.6492	27	1	8.9	158	43	58	27	0.9	1	0	0	6.5
539	1	30.4009	29	2	8.6	168	218	40	61	0.75	0	0	0	2.04
540	1	19.8077	23	2	13.7	184	53	67	96	0.6	0	0	0	6.25
541	1	25.7283	20	2	6.5	146	71	47	24	0.48	0	0	0	5.66
801	1	46.1218	66	2	6.7	217	86	86	11	0.7	0	0	0	33.5
802	1	24.3948	33	2	13.6	176	69	76	33	0.65	0	0	0	112.8
803	1	18.6684	37	2	10.6	224	69	70	14	0.605	0	0	0	62.18
804	1	20.5049	38	2	15.1	264	69	86	31	0.52	0	0	0	19.74
805	1	22.1453	35	1	9	110	166	25	16	0.65	1	0	0	83.68
806	1	20.216	29	1	9.3	136	75	31	16	0.655	1	0	0	107
807	1	20.4738	28	1	6.2	127	64	57	20	0.8	1	0	0	23.18
808	1	20.83	25	2	11.7	229	78	90	15	0.71	0	0	0	76.03
809	1	19.0253	24	2	9.1	136	25	70	13	0.575	0	0	0	29.21
810	1	24.3418	71	2	8.2	155	79	58	26	0.95	0	0	0	4.56
811	1	25.8726	42	2	9.7	163	108	30	16	0.47	0	0	0	9.1
813	1	20.0733	25	1	13.5	127	32	63	31	0.735	0	0	0	6
814	1	18.1775	21	2	6.4	113	22	51	33	0.74	0	0	0	7.49
1001	2	26.8283	54	1	12.3	238	152	34	31	0.99	1	0	0	NA
1002	2	23.1942	48	2	10.6	251	112	89	12	0.53	0	0	0	NA
1003	2	26.7992	37	1	11.6	153	66	36	26	0.8	0	0	0	NA
1004	2	34.1893	32	1	6.4	189	94	36	49	0.8	0	0	0	NA
1005	2	26.9423	52	1	7.4	177	69	38	36	0.92	0	0	0	NA
1006	2	43.7512	28	2	8.4	173	100	54	82	0.42	0	0	0	NA
1007	2	25.1354	48	2	12.8	215	172	42	13	0.73	0	0	0	NA
1008	2	20.755	35	2	9.4	190	150	37	36	0.44	0	0	0	NA
1009	2	29.4974	52	1	8.4	177	121	37	28	0.63	0	0	0	NA
1010	2	27.3819	43	1	10.9	191	81	29	22	0.67	1	0	0	NA
1011	2	26.2046	45	1	11.4	206	147	39	43	0.96	0	0	0	NA
1012	2	21.4281	56	1	11.8	177	183	39	25	0.93	0	0	0	NA
1013	2	23.3381	52	1	13.5	183	165	33	16	0.71	1	0	0	NA
1014	2	19.2901	62	2	10.6	190	60	55	14	0.65	0	0	0	NA
1015	2	28.4735	59	1	6.9	203	375	37	48	1.32	0	0	0	NA
1016	2	28.1622	60	1	11	198	154	46	26	0.82	0	0	0	NA
1017	2	26.0638	53	1	6.8	168	59	44	39	0.81	0	0	0	NA
1018	2	26.0741	33	1	7.9	138	65	43	103	0.81	0	0	0	NA
1019	2	30.4832	48	2	7.5	167	79	39	16	0.58	0	0	0	NA
1020	2	27.9205	43	1	8.6	189	100	36	70	0.8	0	0	0	NA
1021	2	28.135	51	1	6.8	179	178	42	40	0.88	0	0	0	NA
1022	2	23.7667	48	1	8.8	229	145	37	18	0.85	1	0	0	NA
1023	2	27.3797	45	1	6.9	268	321	47	30	0.9	0	0	0	NA
1024	2	25.2249	52	1	11.4	204	209	43	47	1.035	0	0	0	NA
1025	2	19.7337	53	1	7.8	144	71	55	21	0.88	0	0	0	NA
1026	2	23.8531	27	2	8.8	167	225	41	31	0.5	0	0	0	NA
1027	2	30.6444	54	1	8.2	204	149	38	97	0.85	1	0	0	NA
1028	2	24.1535	26	1	7.4	149	159	41	21	1.05	0	0	0	NA
1029	2	21.2384	52	2	14.5	418	121	43	22	0.645	0	0	0	NA
1030	2	32.4607	53	2	7.7	162	84	39	48	0.665	0	0	0	NA
1031	2	32.2705	58	1	7	229	184	32	17	0.97	1	0	0	NA
1032	2	23.5664	60	1	6.3	165	74	45	28	1.09	0	0	0	NA
1033	2	33.8108	48	2	10.6	221	285	39	39	0.59	0	0	0	NA
1034	2	46.444	41	1	8.1	282	151	47	30	0.97	0	0	0	NA
1035	2	24.1288	66	1	6.7	272	136	64	16	0.97	0	0	0	NA
1036	2	25.6513	52	1	5.4	150	257	35	38	0.96	0	0	0	NA
1037	2	27.2687	32	2	10	210	99	38	18	0.68	0	0	0	NA
1038	2	38.7613	44	2	10.4	187	65	40	47	0.46	0	0	0	NA
1039	2	25.6319	65	1	9.4	210	98	52	13	0.82	1	0	0	NA
1040	2	27.4463	30	1	14.5	254	90	42	29	0.72	1	0	0	NA
1041	2	26.754	56	2	8	264	176	44	34	0.49	0	0	0	NA
1042	2	27.5134	54	1	8.3	229	125	41	41	0.7	0	0	0	NA
1043	2	31.1362	30	1	6.7	171	131	30	56	0.73	0	0	0	NA
1044	2	34.5271	48	2	10.9	269	130	49	64	0.585	0	0	0	NA
1045	2	37.6142	33	2	8.5	112	118	30	25	0.575	0	0	0	NA
1046	2	26.8923	42	1	7	188	78	42	13	0.915	1	0	0	NA
1047	2	25.8735	44	1	10.1	147	492	31	16	0.685	1	0	0	NA
1048	2	23.7907	52	2	9.9	199	209	41	20	0.62	0	0	0	NA
1049	2	27.7494	58	1	7.9	175	46	68	31	0.96	0	0	0	NA
1050	2	24.5229	68	1	6.7	165	157	34	22	0.9	1	0	0	NA
1051	2	22.6175	40	1	9.6	171	65	40	17	0.89	0	0	0	NA
1052	2	20.9745	46	2	11.8	192	123	35	148	0.4	0	0	0	NA
1053	2	23.2268	48	1	11.2	171	81	29	22	0.64	0	0	0	NA
1054	2	28.1043	52	1	11.7	213	268	33	93	0.79	0	0	0	NA
1055	2	27.7405	40	1	9.8	154	174	29	19	0.79	0	0	0	NA
1056	2	24.7991	57	2	6.5	230	94	52	28	0.725	0	0	0	NA
1057	2	23.7526	64	2	6	245	143	44	57	0.77	0	0	0	NA
1058	2	22.6981	54	1	6.4	183	189	35	25	0.81	0	0	0	NA
1059	2	26.3326	59	1	6.8	217	393	33	30	0.79	0	0	0	NA
1060	2	21.9101	38	2	6.6	163	58	36	13	0.42	0	0	0	NA
1061	2	21.7025	63	1	11.8	199	136	41	27	0.5	0	0	0	NA
1062	2	25.6206	38	1	9.6	71	89	23	32	0.59	0	0	0	NA
1063	2	29.1749	54	2	8.9	184	85	52	43	0.7	0	0	0	NA
1064	2	29.7608	49	2	9.7	208	82	49	62	0.58	0	0	0	NA
1065	2	19.2382	39	1	6.1	164	95	42	11	0.68	0	0	0	NA
1066	2	40.2957	40	2	10.2	230	353	28	135	0.585	0	0	0	NA
1067	2	27.5929	41	1	6.2	109	51	36	18	0.79	0	0	0	NA
1068	2	26.0176	59	2	8.1	222	185	46	22	0.5	0	0	0	NA
1069	2	21.1061	52	1	13.2	141	53	38	13	0.67	0	0	0	NA
1070	2	23.2521	58	2	7.8	184	125	43	20	0.42	1	0	0	NA
1071	2	25.2082	57	1	5.7	189	68	50	20	0.92	0	0	0	NA
1072	2	21.6188	56	1	12.7	315	1021	30	17	0.835	1	0	0	NA
1073	2	25.7657	43	1	8.2	195	162	36	22	0.85	0	0	0	NA
1074	2	24.5743	59	1	8.1	171	167	32	52	0.72	1	0	0	NA
1075	2	19.6539	58	2	6.7	159	77	68	14	0.79	0	0	0	NA
1076	2	26.1044	50	1	7.9	230	84	48	22	0.9	0	0	0	NA
1077	2	28.6451	45	2	8.6	226	116	49	20	0.48	0	0	0	NA
1078	2	21.8728	48	2	13.5	174	65	54	14	0.37	0	0	0	NA
1079	2	24.04	39	1	5.9	164	386	34	17	1	0	0	0	NA
1080	2	26.4128	56	1	6.5	191	248	37	28	1.11	0	0	1	NA
1081	2	21.3807	61	1	12.9	207	72	49	16	0.71	0	0	0	NA
1082	2	27.9081	56	2	6.7	221	136	64	24	0.52	0	0	0	NA
1083	2	27.317	37	1	9.8	189	274	40	30	0.8	0	0	0	NA
1084	2	24.7589	38	1	6.5	200	118	53	39	0.8	0	0	0	NA
1085	2	35.5327	29	2	9.4	167	91	45	33	0.51	0	0	0	NA
1086	2	28.0658	59	2	5.2	251	154	63	17	0.49	0	0	0	NA
1087	2	24.8702	61	2	6.4	189	201	41	56	0.79	0	0	0	NA
1088	2	29.8925	58	2	9.5	194	164	38	19	0.53	0	0	0	NA
1089	2	25.0629	63	2	7.7	282	63	53	66	0.59	0	0	0	NA
1090	2	24.8191	49	1	7.6	175	250	38	18	0.83	0	0	0	NA
1091	2	31.8465	56	2	10.2	191	415	34	22	0.66	0	0	0	NA
1092	2	28.7115	61	1	6.9	264	77	52	44	0.97	0	0	0	NA
1093	2	27.2368	75	1	12.6	211	129	37	40	0.99	0	0	0	NA
1094	2	26.2308	57	2	7.2	162	60	61	219	0.56	0	0	0	NA
1095	2	23.2657	41	1	7	203	355	40	29	0.76	0	0	0	NA
1096	2	26.4578	26	1	5.2	126	41	36	20	0.84	0	0	0	NA
1097	2	36.9847	29	2	5.3	159	71	47	47	0.48	0	0	0	NA
1098	2	25.646	64	1	6.5	152	85	33	51	0.84	0	0	0	NA
1099	2	24.3864	50	1	7.5	249	135	33	22	1.18	1	0	0	NA
1100	2	23.9253	54	2	8.4	207	247	34	15	0.76	1	0	0	NA
1101	2	28.2851	45	2	12.3	273	174	49	12	0.49	0	0	0	NA
1102	2	35.6153	37	2	6.7	184	229	39	74	0.6	1	0	0	NA
1103	2	30.3694	36	1	12.5	289	286	45	82	0.885	0	0	0	NA
1104	2	21.8848	52	2	6.2	196	74	84	21	0.68	0	0	0	NA
1105	2	23.5696	55	2	10.7	253	326	46	16	0.49	0	0	0	NA
1106	2	30.1486	59	2	5.4	166	63	38	17	0.46	0	0	0	NA
1107	2	28.3921	64	1	6.3	116	44	37	257	0.5	0	0	0	NA
1108	2	27.7835	60	1	6.8	188	79	44	22	0.94	1	0	0	NA
1109	2	25.4153	61	1	6.2	172	161	41	25	0.94	0	0	0	NA
1110	2	33.4377	53	1	6.2	154	75	23	58	0.89	0	0	0	NA
1111	2	30.3576	43	2	5.7	182	85	50	21	0.75	0	0	0	NA
1112	2	25.3375	50	1	9.2	224	303	42	21	0.865	0	0	0	NA
1113	2	25.8226	50	2	6.1	215	126	50	44	0.61	0	0	0	NA
1114	2	22.9658	59	2	6.5	186	92	62	28	0.7	0	0	0	NA
1115	2	36.6653	33	2	8.5	241	105	58	17	0.65	0	0	0	NA
1116	2	37.3576	46	2	6.8	168	123	56	166	0.88	0	1	0	NA
1117	2	25.3906	56	1	10.6	211	178	43	29	0.63	1	0	0	NA
1118	2	25.8372	55	1	7.3	165	66	39	17	0.99	0	0	0	NA
1119	2	26.6188	62	2	6.6	167	161	52	21	0.82	0	0	0	NA
1120	2	26.7341	35	1	7	152	78	35	87	0.79	1	0	0	NA
1121	2	23.0192	58	1	6.2	149	101	39	18	0.82	0	0	0	NA
1122	2	26.208	51	2	10.3	225	252	37	22	0.56	0	0	0	NA
1123	2	26.673	53	1	6.6	115	78	45	20	0.93	0	0	0	NA
1124	2	21.7193	58	2	7.4	143	37	44	21	0.64	0	0	0	NA
1125	2	31.8156	24	1	6.3	183	107	53	26	0.81	0	0	0	NA
1126	2	30.4669	65	2	6	165	126	37	20	0.49	0	0	0	NA
1127	2	28.6412	44	2	7.5	190	116	35	24	0.73	0	0	0	NA
1128	2	23.4398	46	1	10.4	175	588	37	51	0.75	1	0	1	NA
1129	2	29.1544	39	1	6.8	240	66	54	18	0.96	0	0	0	NA
1130	2	24.623	52	1	8	181	181	34	27	1.09	0	0	0	NA
1131	2	26.8669	55	1	6	175	131	34	27	1.02	0	0	0	NA
1132	2	26.7387	50	2	7.3	206	98	47	39	0.77	0	0	0	NA
1133	2	27.7692	47	1	8.4	139	89	36	34	0.96	0	0	0	NA
1134	2	26.8203	43	1	7.3	185	279	39	20	0.88	1	0	0	NA
1135	2	23.8242	41	1	4.9	119	105	38	11	0.74	0	0	0	NA
1136	2	30.0981	28	1	10.3	167	194	35	55	1.1	0	0	0	NA
1137	2	39.7985	45	2	5.9	162	144	38	39	1.1	0	0	0	NA
1138	2	19.5539	46	1	6.1	171	84	61	36	0.89	1	0	0	NA
1139	2	22.0272	60	1	5.9	212	106	41	23	0.72	1	0	0	NA
1140	2	25.815	57	2	7.3	182	41	64	15	0.5	0	0	0	NA
1141	2	29.4108	37	1	12.9	244	103	29	38	0.815	0	0	0	NA
1142	2	27.9715	62	1	7.9	246	240	51	41	1.15	0	0	0	NA
1143	2	23.1735	48	1	10.1	184	50	35	18	0.84	0	0	0	NA
1144	2	25.1193	42	1	6.3	205	108	43	19	0.6	0	0	0	NA
1145	2	23.9902	64	2	6.7	220	143	56	15	0.73	0	0	0	NA
1146	2	24.4561	63	2	6.2	196	124	43	12	0.5	0	0	0	NA
1147	2	22.6233	62	1	6.5	164	76	35	16	0.88	0	0	0	NA
1148	2	28.8872	46	1	5.8	184	94	48	22	0.96	1	0	0	NA
1149	2	21.35	69	1	7	129	147	43	15	0.58	0	0	0	NA
1150	2	28.6499	56	1	4.8	189	258	30	17	0.89	0	0	0	NA
1151	2	26.2845	52	2	9.6	228	198	58	40	0.48	0	0	0	NA
1152	2	21.9869	40	1	6.3	161	85	43	10	0.95	1	0	0	NA
1153	2	26.7755	55	1	9	201	108	37	34	0.86	1	0	0	NA
1154	2	29.5806	42	1	10.2	226	245	34	37	0.75	1	0	0	NA
1155	2	28.3016	33	1	8.4	221	279	47	49	0.775	1	0	0	NA
1156	2	24.7176	49	1	7.6	218	616	37	17	0.75	1	0	0	NA
1157	2	19.7834	56	2	7.5	209	152	43	57	0.78	0	0	0	NA
1158	2	32.1478	43	1	5.4	201	112	30	14	0.91	1	0	0	NA
1159	2	23.0878	73	2	6.5	176	190	41	13	0.62	0	0	0	NA
1160	2	25.0479	59	2	6.5	242	193	44	40	0.61	0	0	0	NA
1161	2	25.3027	49	2	7.7	220	183	48	19	0.64	0	0	0	NA
1162	2	20.6218	61	2	9.1	259	183	73	24	0.675	0	0	0	NA
1163	2	32.6148	54	2	11.4	226	177	35	17	0.53	0	0	0	NA
1164	2	28.0193	54	2	6.9	144	49	42	21	0.77	0	0	0	NA
1165	2	21.0772	29	1	12.9	181	114	35	21	0.67	1	0	0	NA
1166	2	30.132	60	2	5.4	166	108	41	31	0.72	0	0	0	NA
1167	2	24.5243	59	2	11.5	216	725	36	14	0.72	0	0	0	NA
1168	2	27.7391	39	1	8.1	240	177	33	42	0.82	1	0	0	NA
1169	2	22.5098	47	2	6.6	169	302	31	52	0.57	0	0	0	NA
1170	2	27.6888	53	2	7.5	220	186	44	207	0.745	0	0	0	NA
1171	2	29.6833	82	1	6.8	134	134	51	37	1.01	0	0	0	NA
1172	2	22.8019	55	2	8	180	202	29	44	0.57	0	0	0	NA
1173	2	24.4646	59	1	5.2	123	218	25	25	1.19	0	0	0	NA
1174	2	24.3897	53	2	10.3	219	74	95	40	0.53	0	0	0	NA
1175	2	19.8895	79	2	6.6	232	190	43	13	0.85	0	0	0	NA
1176	2	25.1882	46	1	10.5	274	196	56	32	0.88	0	0	0	NA
1177	2	24.3646	38	1	9.7	179	71	41	33	0.82	0	0	0	NA
1178	2	26.52	71	2	5.8	133	124	27	65	0.95	0	0	1	NA
1179	2	25.3365	39	1	6.5	158	94	48	40	0.73	1	0	0	NA
1180	2	29.3513	50	2	7.1	149	98	36	16	0.51	0	0	0	NA
1181	2	29.9111	49	2	8.3	169	102	54	35	0.59	0	0	0	NA
1182	2	29.6293	57	2	6.6	191	131	44	70	0.55	0	0	0	NA
1183	2	27.978	52	1	7.5	152	132	31	27	0.76	0	0	0	NA
1184	2	23.0224	57	2	6.3	140	90	54	30	0.61	0	1	0	NA
1185	2	22.5142	60	2	10.2	164	58	51	26	0.53	0	0	0	NA
1186	2	31.4662	35	2	6.9	193	225	35	48	0.46	1	0	0	NA
1187	2	24.4494	60	2	6.4	157	199	34	19	0.64	0	0	0	NA
1188	2	33.317	60	2	6.4	169	172	39	78	0.64	0	0	0	NA
1189	2	26.079	54	1	10.5	259	167	39	62	0.755	0	0	0	NA
1190	2	22.7537	54	1	7	207	122	44	31	0.94	0	0	0	NA
1191	2	30.8619	52	1	7	172	144	28	19	0.71	1	0	0	NA
1192	2	27.5707	30	1	11.6	202	208	36	101	0.94	1	0	0	NA
1193	2	30.0991	43	2	6.5	195	161	36	59	0.62	0	0	0	NA
1194	2	21.5601	52	2	5.5	143	72	33	88	0.46	0	0	0	NA
1195	2	30.779	70	1	10.1	226	175	34	44	0.89	0	0	0	NA
1196	2	25.6382	38	1	6.3	203	169	36	18	1.1	0	0	0	NA
1197	2	26.2553	51	2	9.2	282	129	44	19	0.595	0	0	0	NA
1198	2	26.8452	62	2	6.7	176	38	70	21	0.47	0	1	0	NA
1199	2	22.9559	70	2	6.8	190	235	34	41	0.73	0	0	0	NA
1200	2	25.343	37	1	8.3	240	172	43	30	0.95	1	0	0	NA
1201	2	26.4769	66	2	7.4	175	116	50	37	0.86	0	0	0	NA
1202	2	21.286	20	2	12.7	208	105	55	17	0.515	1	0	0	NA
1203	2	23.7903	56	2	14.7	187	149	30	28	0.9	0	0	0	NA
1204	2	25.9516	37	1	6.9	215	322	47	14	0.69	0	0	0	NA
1205	2	30.973	55	2	6.8	151	77	49	45	0.73	0	0	0	NA
1206	2	31.9576	49	2	10.8	148	155	33	20	0.32	0	0	0	NA
1207	2	21.0252	60	2	6.8	227	109	76	17	0.87	0	0	0	NA
1208	2	24.06	49	2	7.1	205	107	43	23	0.545	0	0	0	NA
1209	2	26.341	51	1	11.2	160	107	33	24	0.57	0	0	0	NA
1210	2	31.5355	42	2	9.3	189	168	41	21	0.56	0	0	0	NA
1211	2	32.6032	28	1	7	167	107	43	27	0.64	0	0	0	NA
1212	2	20.8128	62	1	8.1	165	63	49	20	0.61	0	0	0	NA
1213	2	26.6574	52	2	9.5	240	176	52	49	0.65	0	0	0	NA
1214	2	24.4922	39	2	5.8	163	101	58	13	0.56	0	0	0	NA
1215	2	25.7858	29	2	9	173	99	42	85	0.435	0	0	0	NA
1216	2	30.7429	47	2	10.2	217	240	41	25	0.92	0	0	0	NA
1217	2	19.2898	84	2	6	277	97	65	18	0.87	0	0	0	NA
1218	2	30.9214	52	2	5.9	225	211	44	17	0.645	0	0	0	NA
1219	2	23.7332	57	1	11.3	208	128	43	18	0.72	0	0	0	NA
1220	2	25.9786	81	2	7.5	216	141	57	14	0.63	0	0	0	NA
1221	2	24.0855	43	1	7	127	191	26	51	0.75	1	0	0	NA
1222	2	32.5267	38	1	6	148	132	29	28	0.65	0	0	0	NA
1223	2	18.4234	28	2	7.6	147	51	53	9	0.49	0	0	0	NA
1224	2	26.48	59	2	12.5	328	347	43	39	0.77	0	0	0	NA
1225	2	25.1824	44	1	5.3	204	129	44	12	0.61	0	0	0	NA
1226	2	28.407	60	1	7.7	156	453	31	27	0.68	0	0	0	NA
1227	2	22.5929	52	2	6.8	173	373	31	57	0.705	0	0	1	NA
1228	2	25.6153	65	1	5.9	148	608	31	41	1.235	0	0	0	NA
1229	2	24.7617	58	1	12.1	182	112	45	23	0.965	0	0	1	NA
1230	2	31.468	56	1	8.4	176	75	36	26	0.73	0	0	0	NA
1231	2	32.8964	37	1	9.2	150	128	28	27	0.775	0	0	0	NA
1232	2	29.9226	54	2	7.4	150	118	45	43	0.96	0	0	0	NA
1233	2	33.4029	25	2	9.5	105	93	39	50	0.44	0	0	0	NA
1234	2	26.6561	60	1	7	231	206	50	40	1.39	0	0	0	NA
1235	2	28.2118	76	2	6.9	250	154	52	23	1.985	0	0	0	NA
1236	2	22.913	82	1	6.5	159	259	32	33	1.3	0	0	0	NA
1237	2	34.1532	35	2	9.6	291	646	31	30	0.585	0	0	0	NA
1238	2	27.3058	36	1	7.1	114	116	28	13	0.73	1	0	0	NA
1239	2	27.3394	54	2	6.5	178	126	40	33	0.72	0	0	0	NA
1240	2	28.4784	54	1	11.1	188	237	38	21	0.74	0	0	0	NA
1241	2	26.1265	63	2	12.4	264	124	43	35	0.655	0	0	0	NA
1242	2	39.7698	35	1	6.2	140	74	29	30	0.83	1	0	0	NA
1243	2	23.1233	42	2	7.8	183	124	52	22	0.46	0	0	0	NA
1244	2	31.5648	49	1	4.8	208	377	51	71	0.58	0	0	0	NA
1245	2	34.2936	62	1	5.5	206	111	36	35	0.86	0	0	0	NA
1246	2	24.5232	59	1	5.4	125	80	30	21	0.88	1	0	0	NA
1247	2	24.5655	47	2	5.7	202	182	36	12	0.66	0	0	0	NA
1248	2	26.037	30	1	6.7	144	71	39	32	0.81	0	0	0	NA
1249	2	37.9207	40	2	10	207	378	38	143	0.56	0	0	0	NA
1250	2	23.8231	58	1	8.9	205	90	50	41	0.55	1	0	0	NA
1251	2	38.1733	46	2	5.8	202	126	54	146	0.67	0	0	0	NA
1252	2	37.3177	28	2	6.2	156	89	40	47	0.63	0	0	0	NA
1253	2	22.4507	45	1	8.8	158	135	41	15	0.8	1	1	0	NA
1254	2	25.8737	57	2	6.4	191	173	49	27	0.51	0	0	0	NA
1255	2	22.4456	47	1	6.4	176	115	28	16	0.98	1	0	0	NA
1256	2	29.0859	38	2	7.3	139	127	37	14	0.5	0	0	0	NA
1257	2	40.0667	31	1	6	148	110	33	28	1.22	0	0	0	NA
1258	2	29.6558	49	1	7.3	207	321	43	41	1.495	0	0	0	NA
1259	2	23.5523	64	1	5.9	230	107	43	26	0.67	0	0	0	NA
1260	2	20.2048	64	1	8.1	222	77	37	34	0.825	0	0	0	NA
1261	2	20.8037	49	2	7.9	173	87	50	10	0.46	0	0	0	NA
1262	2	22.4057	59	1	10	186	78	37	17	0.69	1	0	0	NA
1263	2	33.3384	37	2	5.5	172	54	51	17	0.54	0	0	0	NA
1264	2	25.9403	54	2	6.9	201	178	69	24	0.46	0	0	0	NA
1265	2	26.283	71	1	6.3	169	59	41	23	0.73	1	0	0	NA
1266	2	25.0026	65	1	6.3	140	48	60	31	0.67	0	0	0	NA
1267	2	24.4922	57	1	7.3	149	94	38	33	0.73	0	0	0	NA
1268	2	28.1059	43	1	7.7	178	282	38	27	0.6	0	0	0	NA
1269	2	26.4159	42	1	14.8	226	402	38	24	1.035	1	0	0	NA
1270	2	23.0401	62	1	12.8	205	126	39	16	0.84	0	0	0	NA
1271	2	25.5124	63	2	12.7	206	111	41	59	0.55	0	0	0	NA
1272	2	22.1055	61	1	7.6	168	76	40	52	0.74	0	0	0	NA
1273	2	26.4134	53	1	6.7	157	208	33	30	0.85	0	0	0	NA
1274	2	27.4537	45	1	8.5	201	113	34	28	0.8	1	0	0	NA
1275	2	30.2657	52	1	5.8	193	113	40	50	1.2	0	0	0	NA
1276	2	20.2836	63	2	8.1	221	193	33	21	0.69	0	0	0	NA
1277	2	24.7723	73	1	14.4	221	210	43	39	0.69	0	0	0	NA
1278	2	27.3648	49	1	6.3	159	78	34	11	0.92	1	0	0	NA
1279	2	28.721	55	1	5.9	116	85	34	47	0.94	0	1	0	NA
1280	2	26.3722	37	1	13.5	235	141	32	17	0.915	1	0	0	NA
1281	2	30.623	20	1	7.4	175	65	40	97	0.96	1	0	0	NA
1282	2	24.3555	50	1	6.3	224	326	31	29	0.87	1	0	0	NA
1283	2	23.2225	59	1	6.5	196	202	37	10	1	0	0	0	NA
1284	2	25.3153	48	1	10.9	155	76	33	52	0.88	0	0	0	NA
1285	2	37.8162	46	2	8.8	166	245	28	19	0.61	0	0	0	NA
1286	2	24.0944	63	1	14.1	288	136	49	32	1.155	0	0	0	NA
1287	2	23.5707	51	1	8.5	214	251	36	20	1.35	0	0	0	NA
1288	2	33.1533	36	1	8.8	239	211	39	24	0.825	0	0	0	NA
1289	2	33.3768	33	2	8.6	198	106	46	56	0.7	0	0	0	NA
1290	2	33.174	56	1	6	187	149	33	29	1.03	0	0	0	NA
1291	2	19.827	50	1	5.5	210	177	38	19	0.48	0	0	0	NA
1292	2	22.2446	64	2	6.4	206	133	49	53	0.55	0	0	0	NA
1293	2	28.2428	36	1	6.5	225	124	44	30	1.06	0	0	0	NA
1294	2	34.4009	33	1	5.8	183	130	34	28	0.94	0	0	0	NA
1295	2	25.3367	44	2	5.9	190	142	38	36	0.5	0	0	0	NA
1296	2	22.57	34	2	6.7	148	73	40	20	0.63	0	0	0	NA
1297	2	23.1424	41	1	12.4	259	63	42	25	0.83	0	0	0	NA
1298	2	27.2139	58	1	6.8	205	168	36	62	1.15	0	0	0	NA
1299	2	28.4827	35	2	11.8	263	196	60	12	0.8	0	0	0	NA
1300	2	31.6389	20	1	10.2	215	231	42	62	0.56	0	0	0	NA
1301	2	28.8818	53	2	7.8	209	90	58	33	0.76	0	0	0	NA
1302	2	24.4699	53	1	6.7	289	396	40	31	0.95	1	0	0	NA
1303	2	27.4627	60	2	9.1	207	58	63	18	0.52	0	0	0	NA
1304	2	21.0924	65	1	7.9	155	103	38	33	0.86	0	0	0	NA
1305	2	28.1837	52	2	13.7	227	212	39	16	0.6	0	0	0	NA
1306	2	19.663	74	1	7.2	259	112	48	14	1.025	0	0	0	NA
1307	2	29.2932	54	2	10	237	135	55	25	0.495	0	0	0	NA
1308	2	22.8194	64	1	9	197	145	37	13	0.72	1	0	0	NA
1309	2	28.0557	47	1	10.8	212	134	38	67	0.66	1	0	0	NA
1310	2	24.1154	42	1	8.6	204	112	42	44	0.76	1	0	0	NA
1311	2	29.5301	60	1	6.4	241	216	50	58	1.13	0	0	0	NA
1312	2	19.9838	32	2	13.9	270	75	62	15	0.53	0	0	0	NA
1313	2	31.0942	41	2	15.5	229	409	33	16	0.75	0	0	0	NA
1314	2	24.9255	61	1	13.1	206	227	33	30	1.16	0	0	0	NA
1315	2	24.2292	60	2	5.8	144	145	38	166	0.71	0	0	0	NA
1316	2	29.1438	51	2	4.9	132	52	54	24	0.54	0	0	0	NA
1317	2	23.9414	61	2	7.9	199	84	55	39	0.56	0	0	0	NA
1318	2	22.9799	40	1	10.5	169	172	41	23	0.61	0	0	0	NA
1319	2	26.2468	66	1	7.9	178	103	42	43	0.86	0	0	0	NA
1320	2	25.7593	51	2	10.2	229	225	40	30	0.545	0	0	0	NA
1321	2	23.8342	53	2	5.9	233	234	45	38	0.55	0	0	0	NA
1322	2	18.9757	50	1	11.5	257	228	43	20	0.775	0	0	0	NA
1323	2	33.3201	51	2	6.4	190	142	50	61	0.73	0	0	0	NA
1324	2	23.6262	72	1	8.5	168	97	37	17	0.935	0	0	0	NA
1325	2	35.3938	38	2	7.8	154	158	35	52	0.71	0	0	0	NA
1326	2	29.4756	43	1	12.7	201	87	33	36	0.865	0	0	0	NA
1327	2	27.1186	52	2	6	188	164	50	36	0.59	0	0	0	NA
1328	2	25.1361	52	1	8.6	258	149	64	24	0.67	0	0	0	NA
1329	2	23.252	77	2	6.5	225	603	42	18	0.65	0	0	0	NA
1330	2	20.9859	65	1	4.4	119	58	34	24	0.86	1	0	0	NA
1331	2	22.8582	31	1	6.7	204	71	45	26	0.86	0	0	0	NA
1332	2	29.4489	36	1	7.1	183	74	45	39	0.94	0	0	0	NA
1333	2	25.8834	61	2	7.5	201	132	60	34	0.66	0	0	0	NA
1334	2	27.258	53	1	6.2	119	63	41	46	0.95	0	1	0	NA
1335	2	25.5257	54	1	13	214	727	34	34	1.17	0	0	0	NA
1336	2	24.8301	34	1	7.2	126	43	38	40	0.89	1	0	0	NA
1337	2	22.2629	59	2	7.2	203	229	52	15	0.53	0	0	0	NA
1338	2	28.4799	60	2	12.9	181	165	47	21	0.56	0	0	0	NA
1339	2	23.8518	62	2	6.8	152	112	41	37	0.67	0	0	0	NA
1340	2	32.5409	57	2	8.5	231	80	59	42	0.51	0	0	0	NA
1341	2	23.2335	62	1	9.4	266	214	42	38	0.725	0	0	0	NA
1342	2	24.7294	45	1	7.7	169	143	35	52	0.94	1	0	0	NA
1343	2	24.3291	54	2	10.1	238	195	57	15	0.58	0	0	0	NA
1344	2	34.4155	32	2	7.5	261	129	50	24	0.4	0	0	0	NA
1345	2	27.9026	54	2	7.9	259	71	49	23	0.695	0	0	0	NA
1346	2	25.3278	48	1	7.3	156	45	48	25	0.77	0	0	0	NA
1347	2	28.3651	63	1	7.7	167	668	29	39	0.915	1	0	0	NA
1348	2	33.218	51	1	6.3	162	353	32	23	1.13	1	0	0	NA
1349	2	36.2174	38	2	6.1	139	104	38	70	0.42	0	0	0	NA
1350	2	26.3916	65	1	6.9	229	102	93	48	1.02	0	0	0	NA
1351	2	35.1323	44	1	8.8	168	110	56	34	0.8	0	0	0	NA
1352	2	23.7338	54	2	6.3	220	360	43	10	0.955	0	0	0	NA
1353	2	31.0151	53	1	7.1	175	383	36	28	1.11	0	0	0	NA
1354	2	21.3928	53	1	8.3	216	150	49	30	1.89	0	0	0	NA
1355	2	27.4995	57	1	14.8	280	120	53	20	0.89	0	0	0	NA
1356	2	27.571	28	2	5.9	211	165	43	29	0.47	0	0	0	NA
1357	2	26.483	44	1	7.1	253	188	41	16	0.73	1	0	0	NA
1358	2	22.3171	62	2	9.7	216	75	51	16	0.52	0	0	0	NA
