# Supplementary material for: A convenient diagnostic tool for discriminating adult-onset glutamic acid decarboxylase antibody-positive autoimmune diabetes from type 2 diabetes: a retrospective study
Source: PeerJ journal article supplement (doi:10.7717/peerj.8610), 2020-02-14

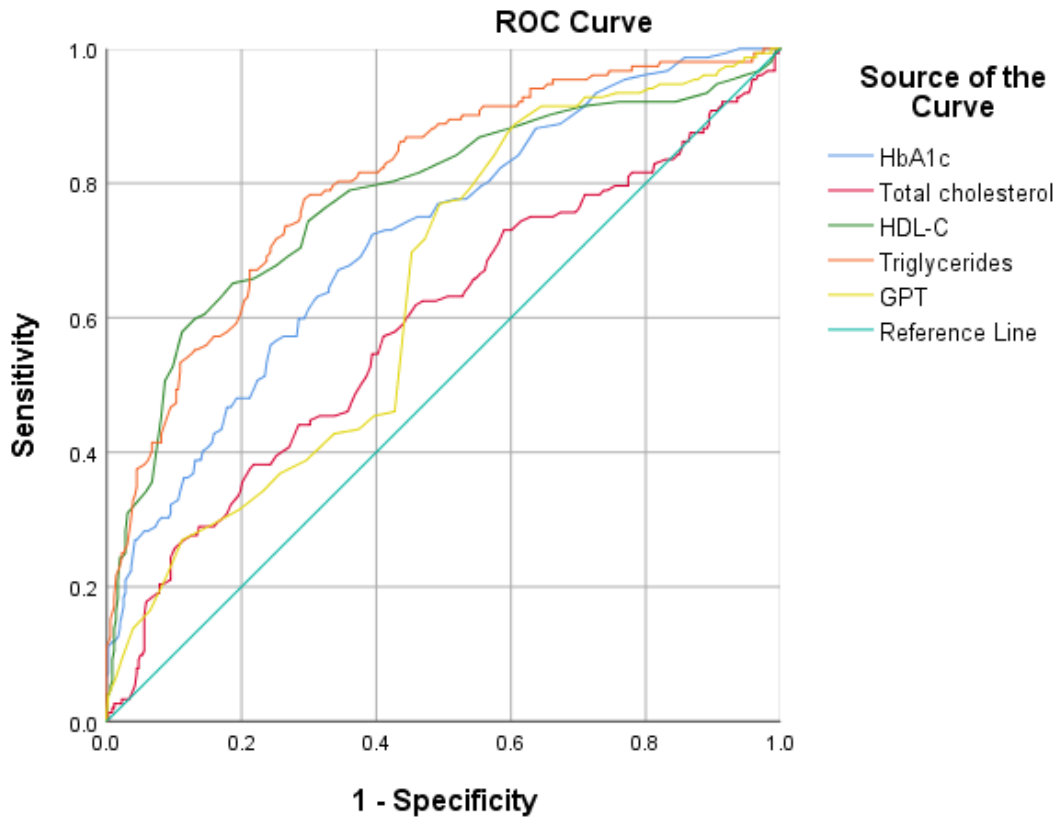

Supplement: Figure_S1.pdf [file Figure_S1.pdf]
